# Supplementary material for: A phosphonium ionic liquid conjugated magnetic graphitic carbon nitride nanocomposite: an effective sample pretreatment tool for selenium separation and determination
Source: Royal Society of Chemistry journal article supplement (doi:10.1039/d3ay01312j), 2023-01-01
Supplement: d3ay01312j1.pdf [file d3ay01312j1.pdf]

**Phosphonium ionic liquid conjugated magnetic graphitic carbon nitride nanocomposite:**

**An effective sample pretreatment tool for selenium separation and determination**

Emmanuvel Arputharaj<sup>1</sup>, Shivangi Singh<sup>1</sup>, Raghavendra Rao Pasupuleti<sup>1</sup>, Chun-An Kuo<sup>1</sup>, Wei-Jyun Ya<sup>1</sup>, Yu-Hui Huang<sup>1</sup>, You-Rong Wu<sup>1</sup>, Yu-Ying Chao<sup>2,4</sup>, Yeou-Lih Huang<sup>1,3,4,5,6\*</sup>

<sup>1</sup>Department of Medical Laboratory Science and Biotechnology, Kaohsiung Medical University, Kaohsiung, Taiwan

<sup>2</sup>Department of Public Health, Kaohsiung Medical University, Kaohsiung, Taiwan

<sup>3</sup> Department of Medical Research, Kaohsiung Medical University Hospital, Kaohsiung Medical University, Kaohsiung, Taiwan

<sup>4</sup>Research Center for Precision Environmental Medicine, Kaohsiung Medical University, Kaohsiung, Taiwan

<sup>5</sup>College of Professional Studies, National Pingtung University of Science and Technology, Pingtung, Taiwan

<sup>6</sup>Department of Chemistry, National Sun Yat-sen University, Kaohsiung, Taiwan

**\* Corresponding author:**

Name: Yeou-Lih Huang Ph.D., Professor

E-mail: [yelihu@kmu.edu.tw](mailto:yelihu@kmu.edu.tw)

Office phone: 886-(07)3121101ext 2251

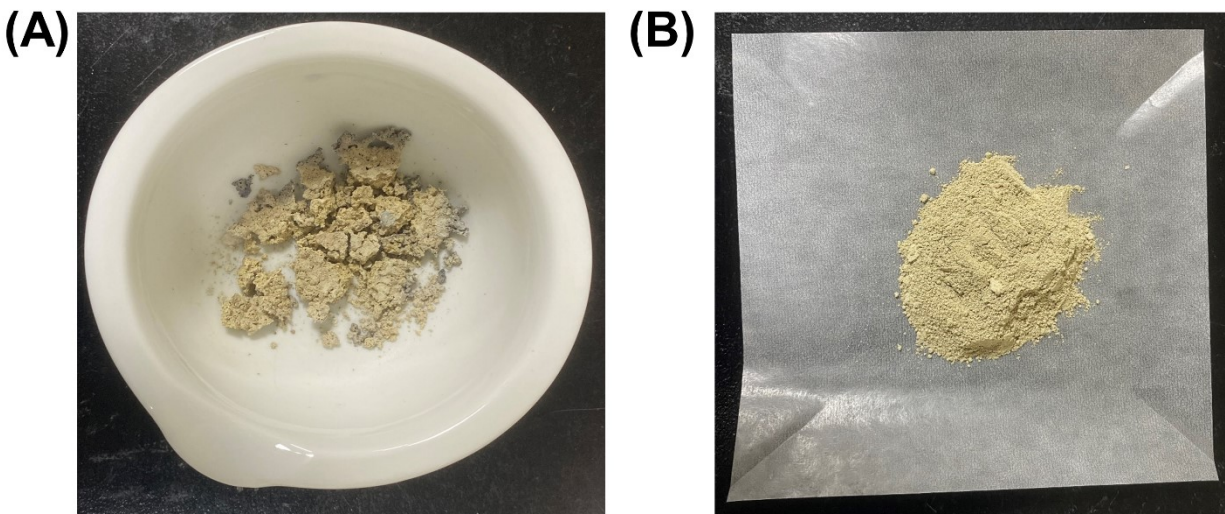

**Fig. S1** Graphitic carbon nitride preparation (A and B). Yellow color bulk-GCN was produced by calcining melamine precursor at 500 °C for 4 h in a muffle furnace (A), then grounded it into a fine powder using mortar and pestle for a subsequent adsorbent fabrication step (B).

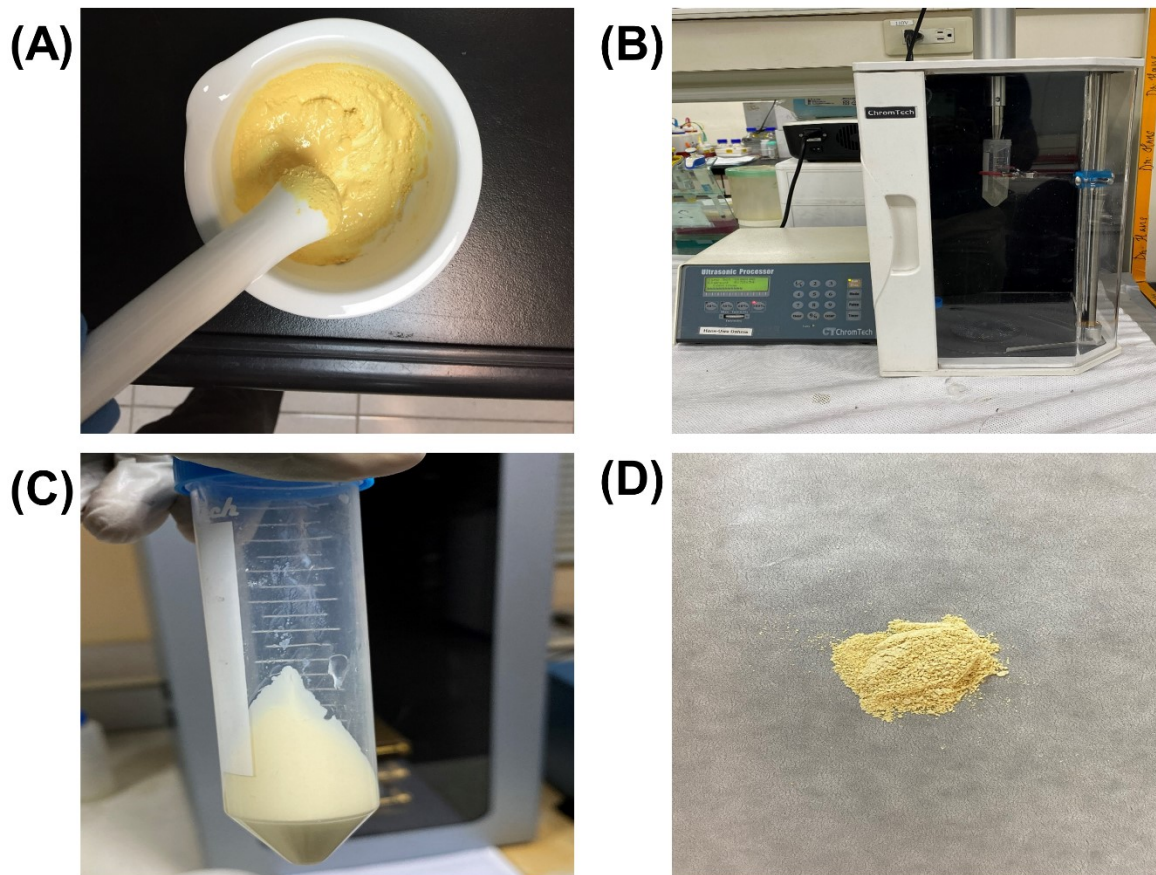

**Fig. S2** Phosphorous group containing  $[\text{hmim}]^+ [\text{PF}_6]^-$  (P-IL) ionic liquid ligand coating (A-D). Bulk-GCN paste was created by pulverizing 2.0 g of bulk-GCN powder and 4.0 g of P-IL (A). After that, 25 mL of a 1:1, V/V mixture of absolute ethanol and acetonitrile was added to the paste (B). Finally, the final product was centrifuged at 6000 rpm (C) and dried at 80°C (D).

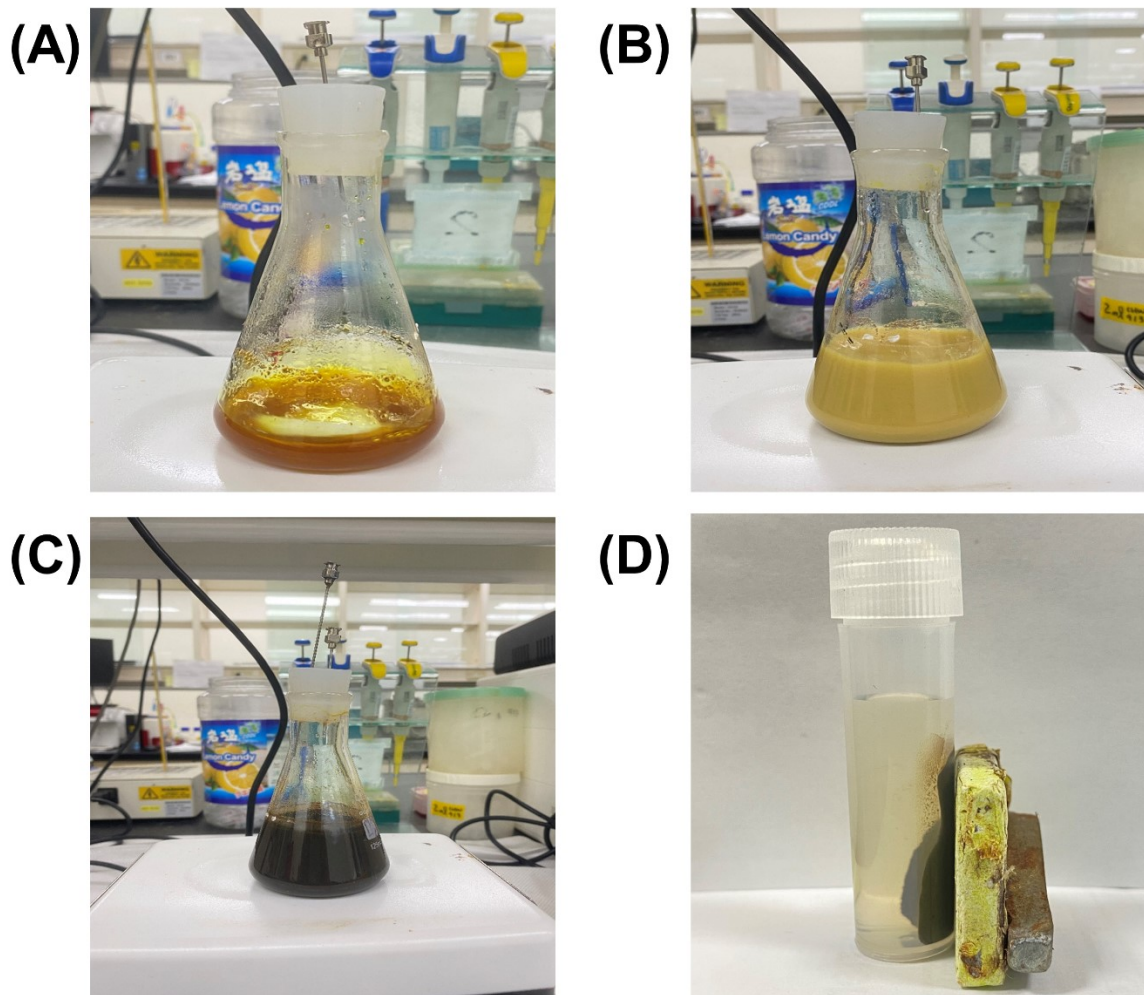

**Fig. S3** Magnetic nanoparticle ( $\text{Fe}_3\text{O}_4$ ) co-hybridization (A-D). Mixture of  $\text{FeCl}_3 \cdot 6\text{H}_2\text{O}$  (1.838 g) and  $\text{FeCl}_2 \cdot 4\text{H}_2\text{O}$  (0.703 g) in 10 mL of ultrapure water under 80 °C (A), was later mixed with the 50 mL of (2:1) water and absolute ethanol solution mixture contain, 0.15 g of P-IL@GCN NSs (B). Finally,  $\text{Fe}_3\text{O}_4$  was co-precipitated with P-IL@GCN NSs by adding 15 mL of ammonia solution, which caused the solution color shift from yellow to pure black (C), demonstrating the successful synthesis of final magnetic nanocomposite solid-phase adsorbent (MNC-SPE) (D).

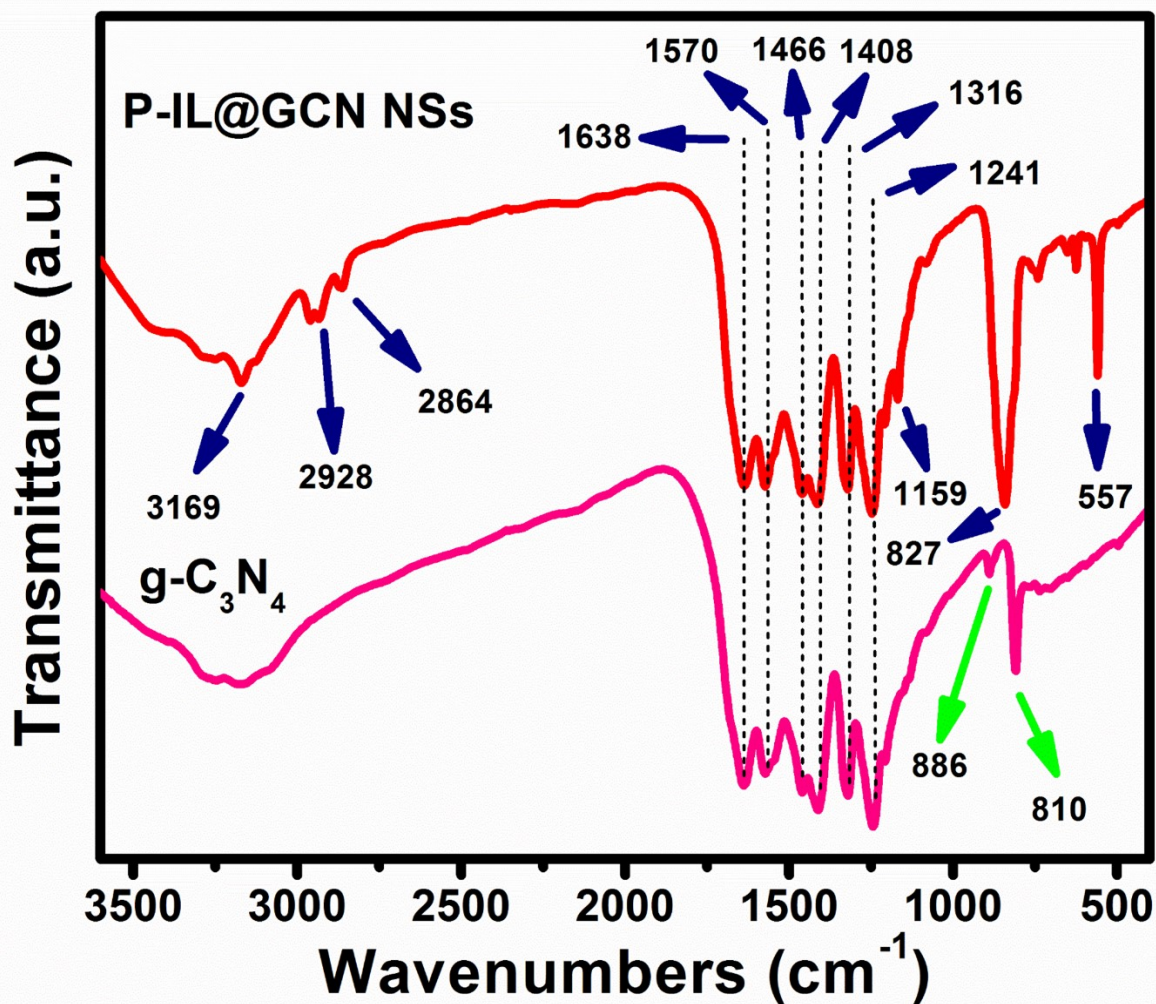

**Fig. S4** Surface functional group characterization. FTIR spectral data of pure bulk-GCN (g-C<sub>3</sub>N<sub>4</sub>) (pink spectra) and P-IL integrated GCN NSs (red spectra).

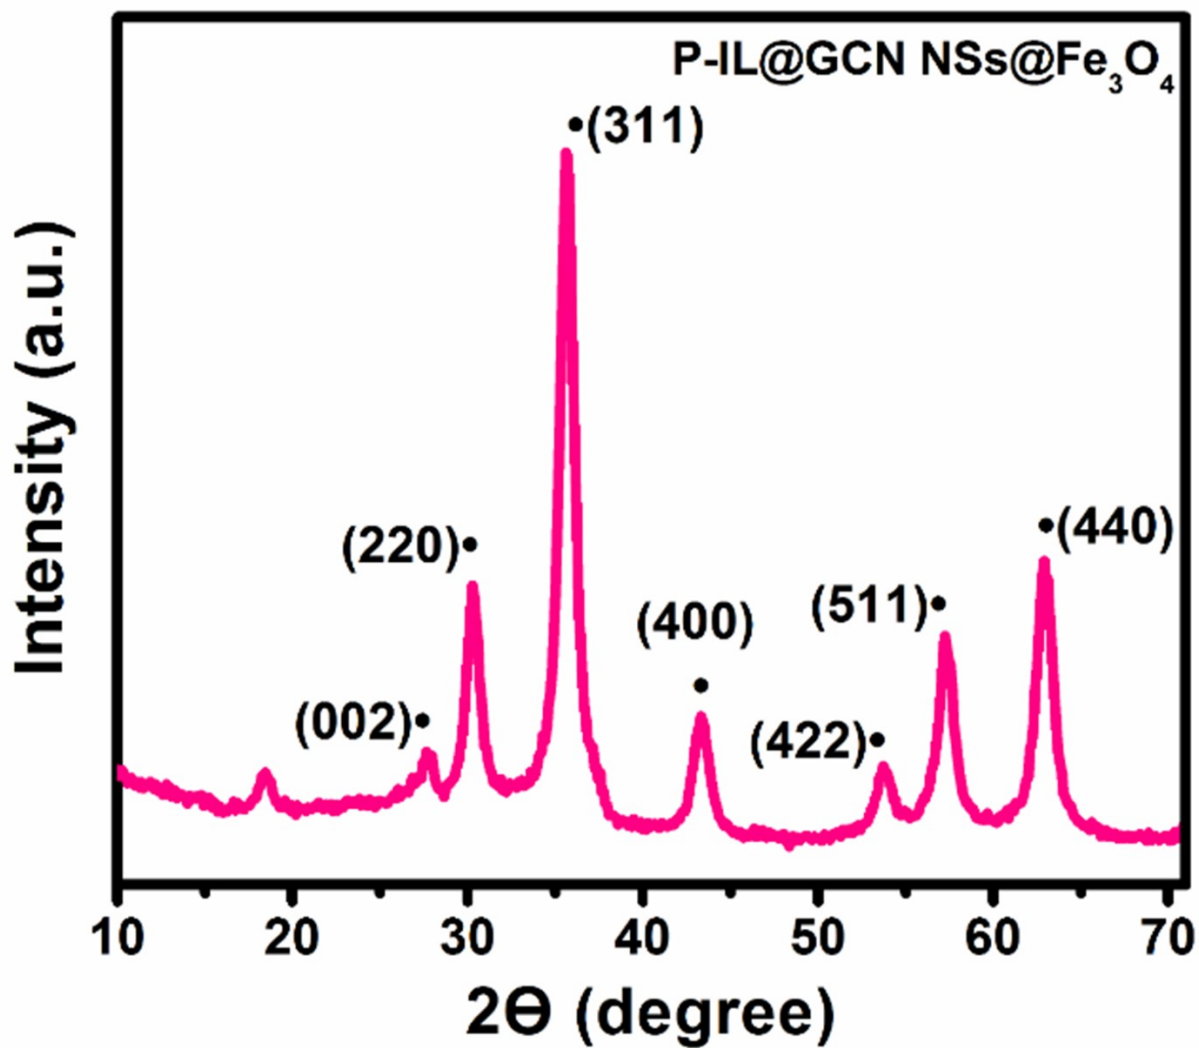

**Fig. S5** Deconvoluted XRD spectra related to the P-IL@GCN NSs@Fe<sub>3</sub>O<sub>4</sub> (MNC-SPE) nanocomposite.

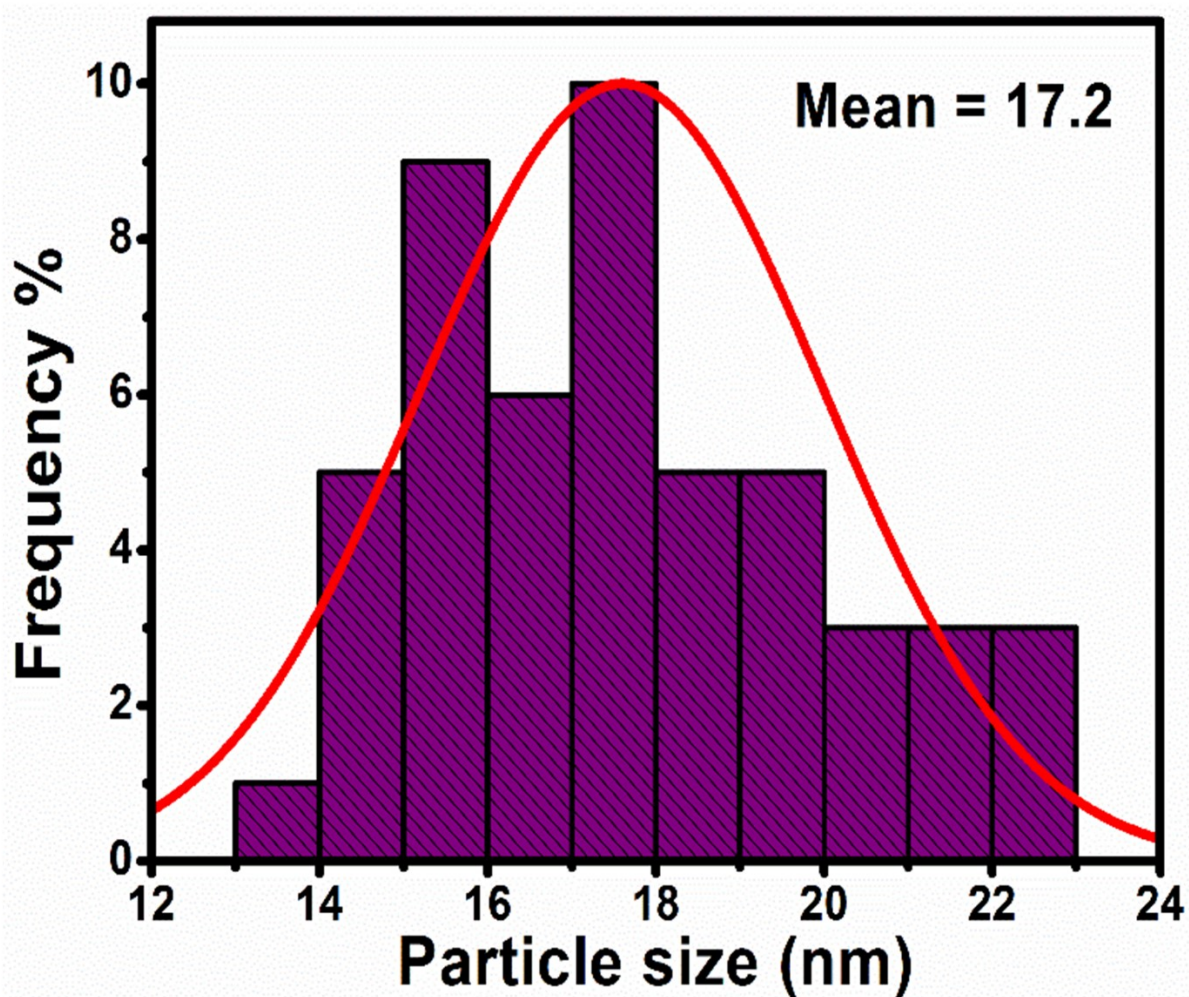

**Fig. S6** Image software assisted particle size distribution analysis of fabricated MNC-SPE nanocomposite.

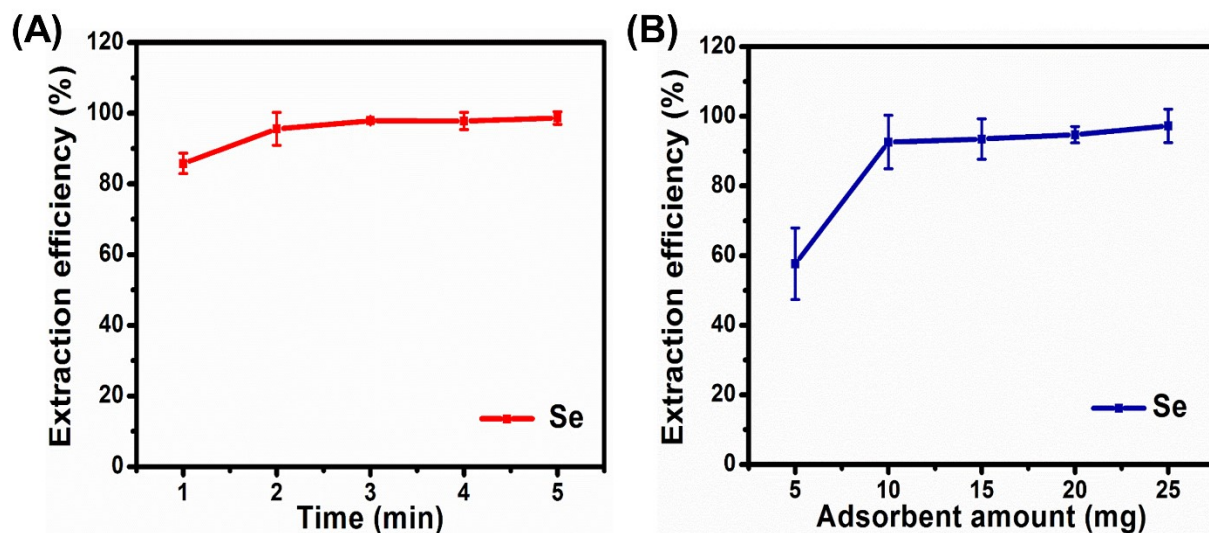

**Fig. S7** Key reaction parameters optimization for the effective Se extraction and desorption (A and B). Contact time was optimized by varying the contact time (1, 2, 3, 4, and 5 min) while maintaining other parameters constant (adsorbent dosage = 10 mg, Se concentration = (100 pg  $\mu\text{L}^{-1}$  and se volume = 1.0 mL) (A). Then, using above utilized same reaction conditions, the adsorbent dosage was optimized by altering the adsorbent dosage between 5 and 25 mg (B). (n=3)

\* Resultant solutions from all the experiments were subjected to ICP-MS for Se determination.

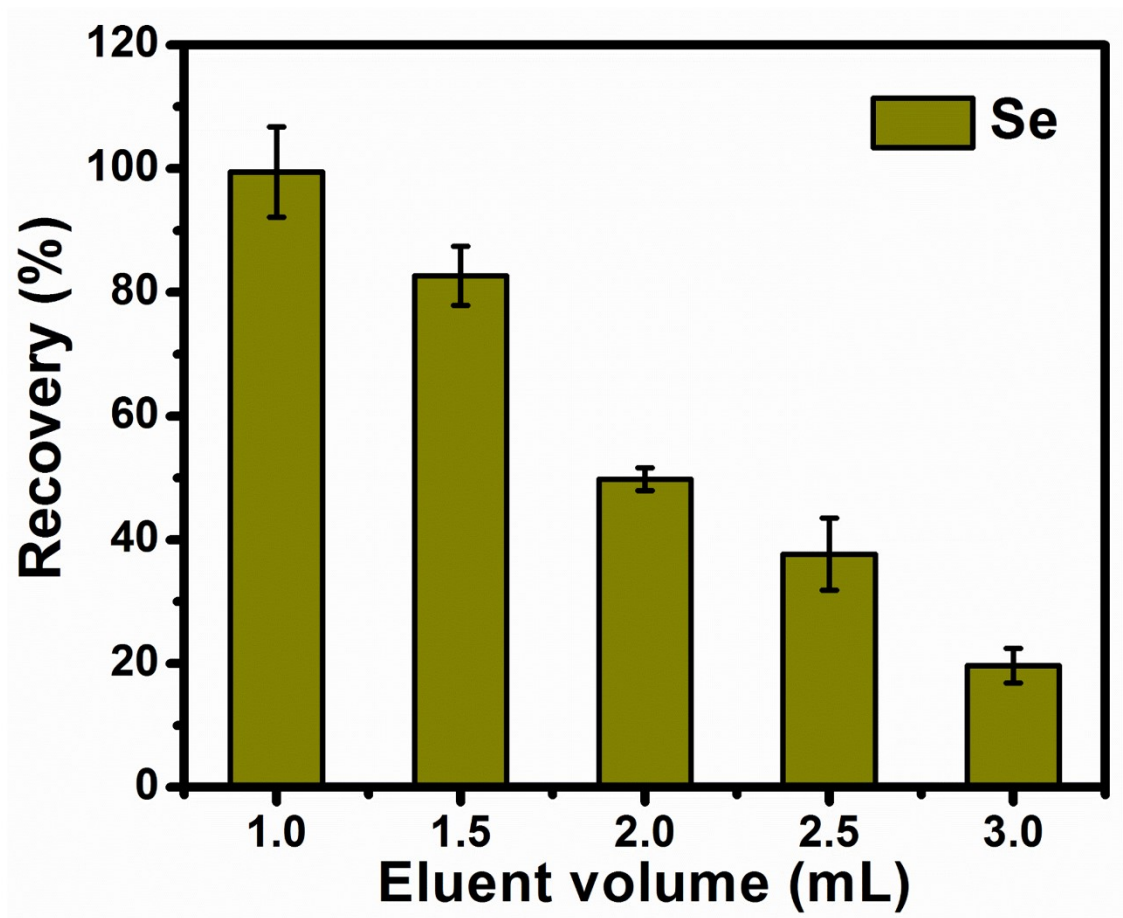

**Fig. S8** Effect of eluent volume on the Se extraction by MNC-SPE. MNC-SPE adsorbent containing Se was treated with various eluent (0.5 M NaOH) volume condition between 1.0 and 3.0 mL for 10 min to optimize the ideal eluent volume required for the effective se desorption (n=3).

\* Resultant solutions from all the experiments were subjected to ICP-MS for Se determination.

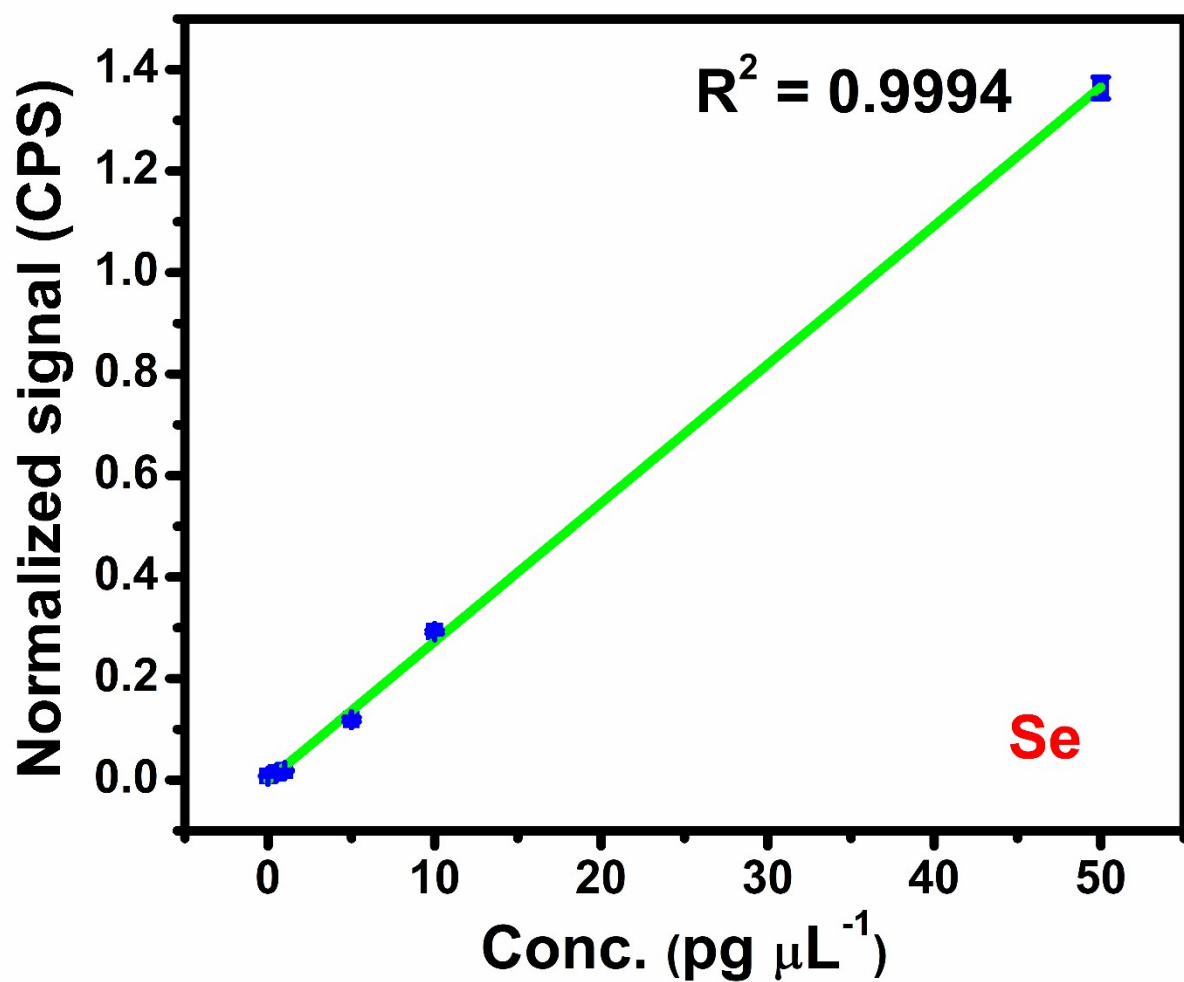

**Fig. S9** Sensitivity characteristics of the fabricated MNC-SPE toward Se metal under the optimal reaction condition (n=3). \*CPS = Counts per second, \*Conc. = Concentration and \* $R^2$  = Correlation coefficient.

| <b>Table S1.</b> The MNC-SPE assisted ICP-MS approach practicality to determining Se in actual water samples (n=6). |             |                                               |                                              |              |
|---------------------------------------------------------------------------------------------------------------------|-------------|-----------------------------------------------|----------------------------------------------|--------------|
| Analyte                                                                                                             | Sample Name | Spiked concentration (pg $\mu\text{L}^{-1}$ ) | Found concentration (pg $\mu\text{L}^{-1}$ ) | Recovery (%) |
| Se                                                                                                                  | Tap water   | 0                                             | 0.5                                          | -            |
|                                                                                                                     |             | 10                                            | 12.05                                        | 115.5        |
|                                                                                                                     |             | 50                                            | 53.03                                        | 105.1        |
|                                                                                                                     |             | 100                                           | 105.88                                       | 105.4        |
|                                                                                                                     | River water | 0                                             | 1.13                                         | -            |
|                                                                                                                     |             | 10                                            | 9.88                                         | 87.6         |
|                                                                                                                     |             | 50                                            | 53.56                                        | 104.9        |
|                                                                                                                     |             | 100                                           | 93.15                                        | 92.0         |

**Table S2.** Applicability of the MNC-SPE assisted ICP-MS approach to determining Se in Certified reference material (CRM) (n=6).

| Analyte | Sample Name | Available concentration<br>(pg $\mu\text{L}^{-1}$ ) | Found concentration<br>(pg $\mu\text{L}^{-1}$ ) |                           | Recovery (%)    |                           |
|---------|-------------|-----------------------------------------------------|-------------------------------------------------|---------------------------|-----------------|---------------------------|
| Se      | CRM-TMDW    | $10.0 \pm 0.1$                                      | ICP-MS approach                                 | MNC-SPE / ICP-MS approach | ICP-MS approach | MNC-SPE / ICP-MS approach |
|         |             |                                                     | 10.3                                            | 9.16                      | 103.14          | 91.63                     |
